# Supplementary material for: Variation in the flowering time orthologs BrFLC and BrSOC1 in a natural population of Brassica rapa
Source: PubMed Central journal article supplement (PMC4671188; doi:10.7717/peerj.1339), 2015-11-30

**S1a** *Br000393*

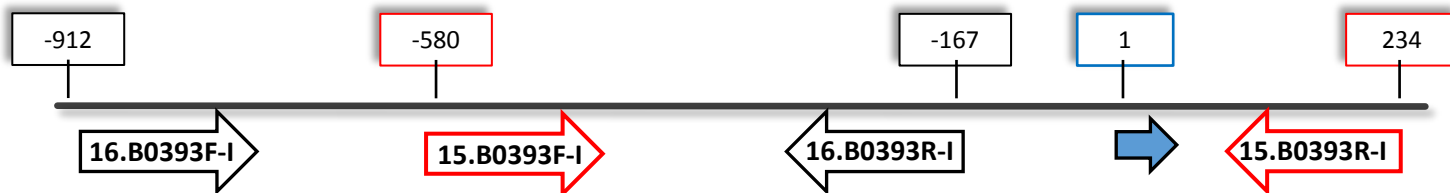

**S1b** *Br004928*

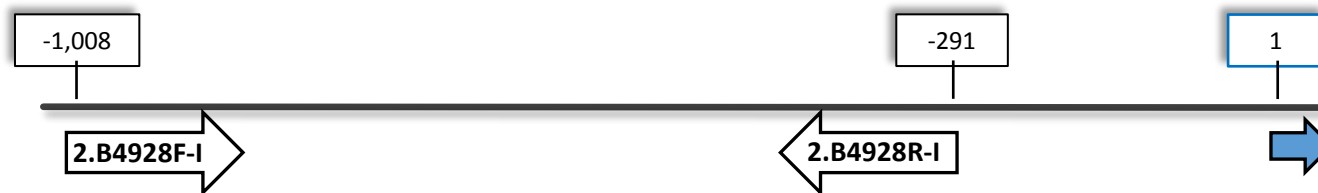

**S1c** *Br0039324*

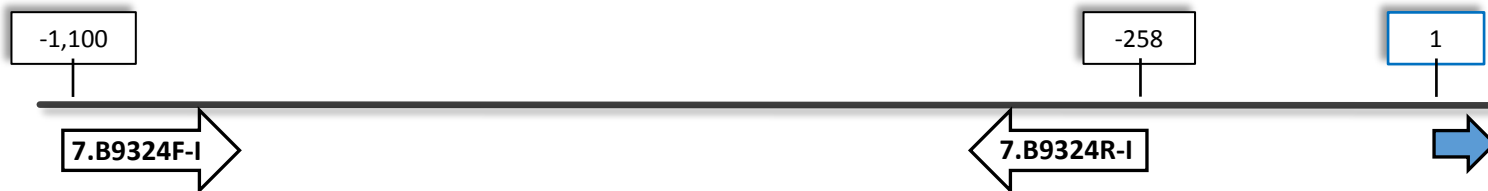

**S1d** *Exon 6, UTR*

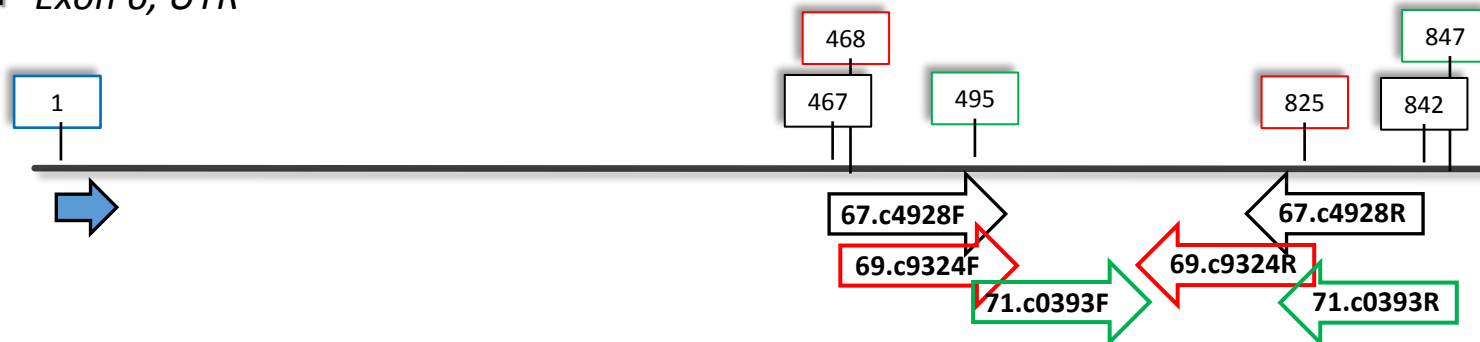

Supplement: peerj-03-1339-s001.pdf [file peerj-03-1339-s001.pdf]
