# Supplementary material for: Variation in the flowering time orthologs BrFLC and BrSOC1 in a natural population of Brassica rapa
Source: PubMed Central journal article supplement (PMC4671188; doi:10.7717/peerj.1339), 2015-11-30

## S2a *BrFLC* promoter primers

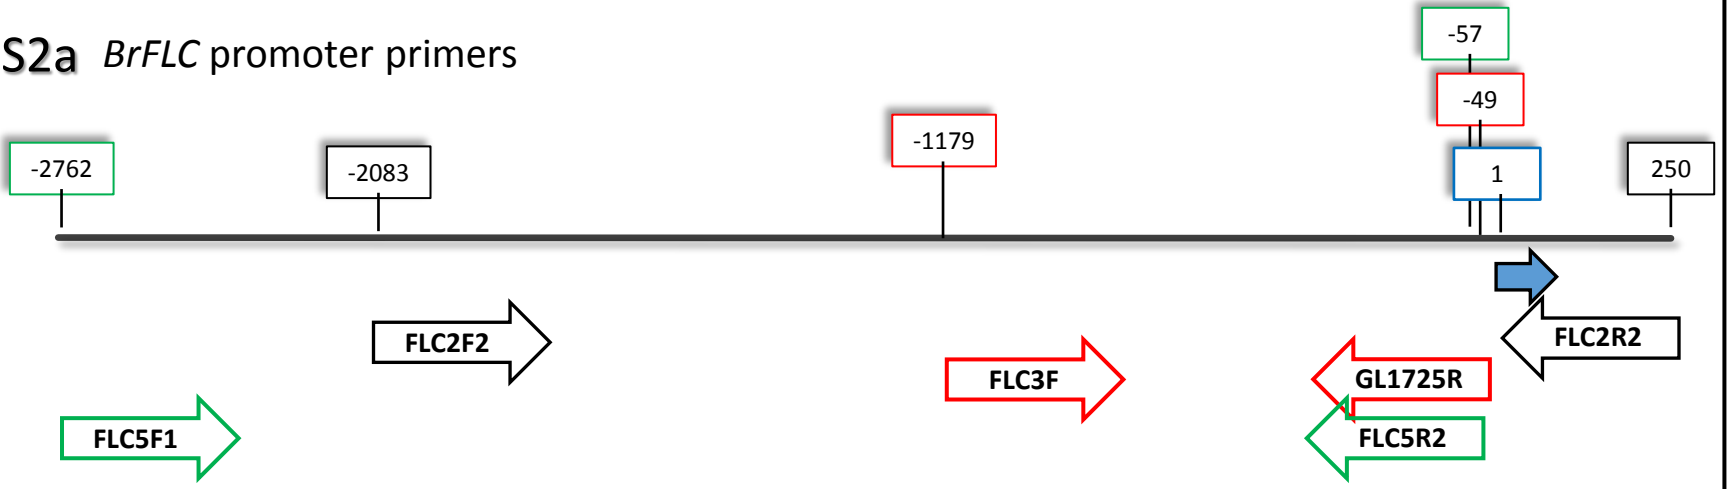

## S2b *BrFLC* coding primers

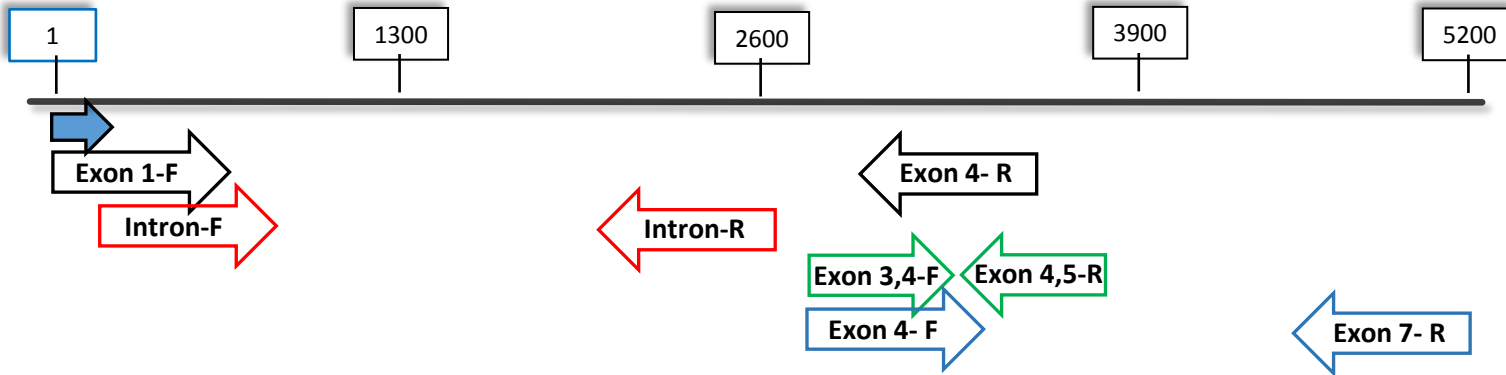

Supplement: peerj-03-1339-s002.pdf [file peerj-03-1339-s002.pdf]
